# Supplementary material for: High‐Density Lignin‐Derived Carbon Nanofiber Supercapacitors with Enhanced Volumetric Energy Density
Source: PubMed Central journal article supplement (PMC8425891; doi:10.1002/advs.202100016), 2021-05-20
Supplement: ADVS-8-2100016-s001.pdf [file ADVS-8-2100016-s001.pdf]

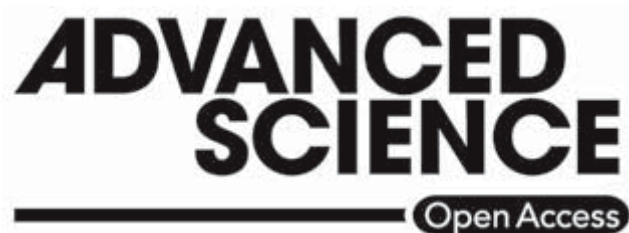

## Supporting Information

for *Adv. Sci.*, DOI: 10.1002/adv.202100016

### **High-density Lignin-derived Carbon Nanofiber Supercapacitors with Enhanced Volumetric Energy Density**

*Servann Hérou, Josh J Bailey, Matt Kok, Philipp Schlee, Rhodri Jervis, Dan J. L. Brett, Paul R. Shearing, Maria Crespo Ribadeneyra,\* and Magdalena Titirici\**

## Supplementary Materials for

### **High-density lignin-derived carbon nanofiber supercapacitors with enhanced volumetric energy density**

Servann Hérou<sup>1</sup>, Josh J Bailey<sup>2,3</sup>, Matt Kok<sup>2,3</sup>, Philipp Schlee<sup>1</sup>, Rhodri Jervis<sup>2,3</sup>, Dan J.L. Brett<sup>2,3</sup>, Paul R. Shearing<sup>2,3</sup>, Maria Crespo Ribadeneyra<sup>1\*</sup> and Magdalena Titirici<sup>1,3\*</sup>

\*Corresponding authors. Email: [m.crespo-ribadeneyra@imperial.ac.uk](mailto:m.crespo-ribadeneyra@imperial.ac.uk) and [m.titirici@imperial.ac.uk](mailto:m.titirici@imperial.ac.uk)

This PDF file includes:

Supplementary Text

Figs. S1 to S10

Tables S1 to S2

References (1 to 3) (only referring to papers in the SM)

Other Supplementary Materials for this manuscript include the following:

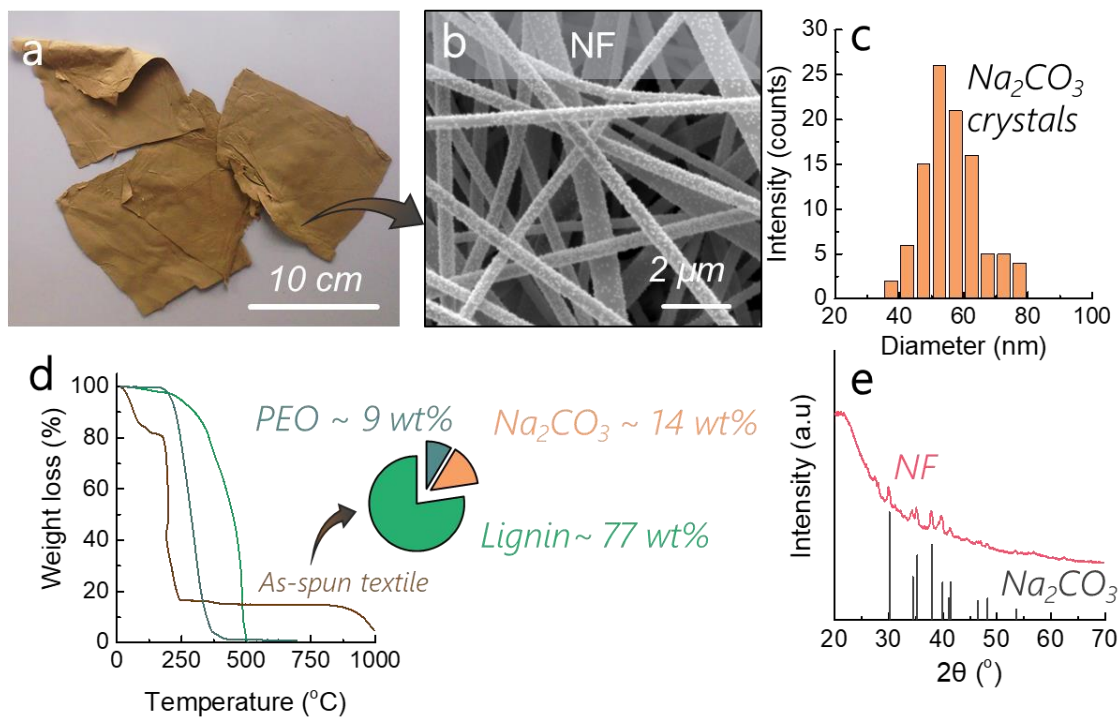

Fig S1. (a) Photograph of the mat after electrospinning; (b) Scanning Electron Micrograph (SEM) of the as-spun mat (NF); (c) Diameter distribution of the sodium carbonate crystals visible on the surface of the nanofibers obtained from micrograph (b); (d) Thermo-gravimetric analysis (TGA) of the as-spun textile, PEO and organosolv lignin in air at 10 °C.min<sup>-1</sup>; (e) X-Ray Diffraction (XRD) pattern of the as-spun sample NF showing the characteristic peaks of the monoclinic phase of sodium carbonate Na<sub>2</sub>CO<sub>3</sub> (Source: Crystallographic database, Reference code: 00-037-0451).

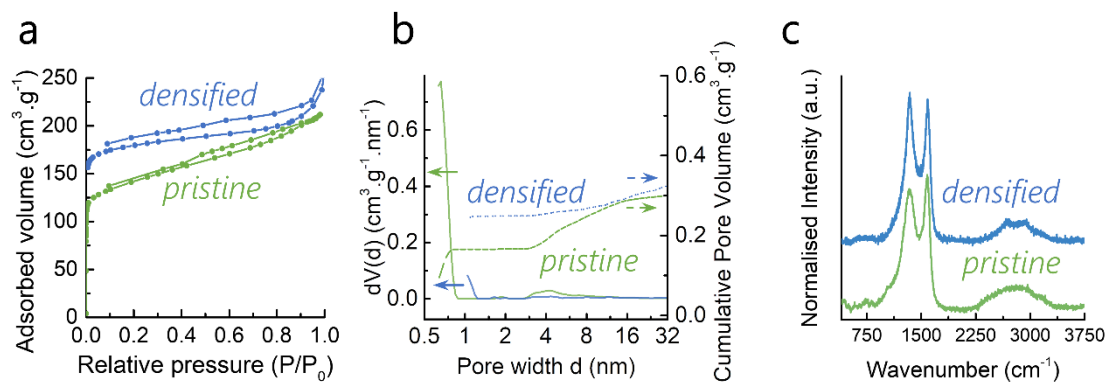

Fig S2. Gas adsorption measurements. (a)  $\text{N}_2$  ad-/desorption isotherms at 77 K and (b) Pore size distribution calculated from QSDFT model on the adsorption line and (c) Raman spectra measured with an excitation wavelength of 532nm.

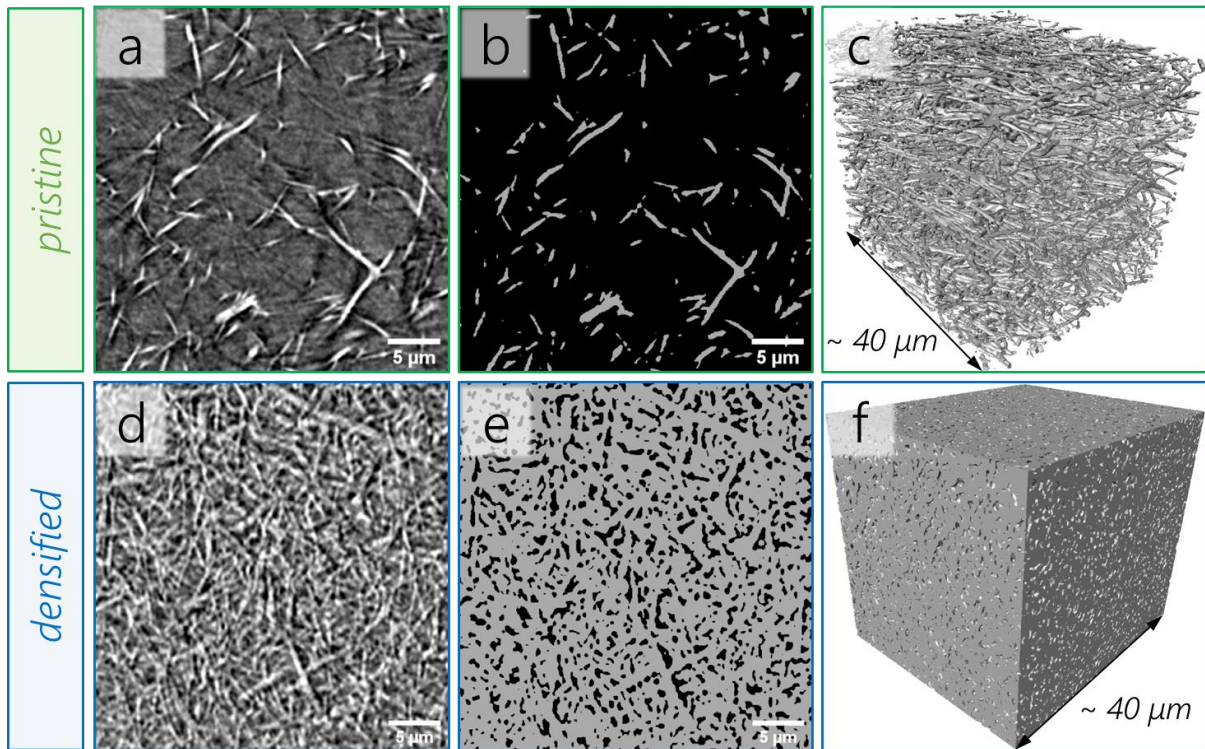

Fig S3. X-ray nano-CT of the pristine (a,b,c) and densified samples (d,e,f) showing a,d) orthoslices from raw tomograms; b,e) Binary segmentations thereof; and (c,f) Surface renderings of the segmented fibers.

Table S1. Porosity data calculated via N<sub>2</sub> adsorption and X-ray nano-computed tomography (nano-CT)

a) Surface properties calculated from the N<sub>2</sub> adsorption line at 77 K and porosity data

|                  | $S_{\text{BET}}$<br>[m <sup>2</sup> .g <sup>-1</sup> ] | $S_{\text{DR}}$<br>[m <sup>2</sup> .g <sup>-1</sup> ] | $V_{\text{DR}}$<br>[cm <sup>3</sup> .g <sup>-1</sup> ] | $S_{\text{DFT}}$<br>[m <sup>2</sup> .g <sup>-1</sup> ] | $V_{\text{TOT DFT}}$<br>[cm <sup>3</sup> .g <sup>-1</sup> ] | $\frac{V_{\text{MICRO}}}{V_{\text{TOTAL}}}$ (%) | $S_{\text{BJH}}$<br>[m <sup>2</sup> .g <sup>-1</sup> ] | $V_{\text{BJH}}$<br>[cm <sup>3</sup> .g <sup>-1</sup> ] |
|------------------|--------------------------------------------------------|-------------------------------------------------------|--------------------------------------------------------|--------------------------------------------------------|-------------------------------------------------------------|-------------------------------------------------|--------------------------------------------------------|---------------------------------------------------------|
| <i>pristine</i>  | 531                                                    | 564                                                   | 0.201                                                  | 609                                                    | 0.301                                                       | 56                                              | 71                                                     | 0.124                                                   |
| <i>densified</i> | 716                                                    | 781                                                   | 0.278                                                  | 830                                                    | 0.328                                                       | 76                                              | 30                                                     | 0.117                                                   |

b) Analysis of “pristine” and “densified” volumes and surface areas from binary segmented tomograms captured by X-ray nano-CT

|                  | Phase  | Absolute volume<br>[μm <sup>3</sup> ] | Volume fraction<br>(-) | Absolute surface area<br>[μm <sup>2</sup> ] | Volume-specific<br>surface area<br>[μm <sup>-1</sup> ] |
|------------------|--------|---------------------------------------|------------------------|---------------------------------------------|--------------------------------------------------------|
| <i>pristine</i>  | Fibers | 3628                                  | 8%                     | 33876                                       | 0.75                                                   |
|                  | Pores  | 41826                                 | 92%                    |                                             |                                                        |
| <i>densified</i> | Fibers | 36339                                 | 79%                    | 91881                                       | 2.01                                                   |
|                  | Pores  | 9450                                  | 21%                    |                                             |                                                        |

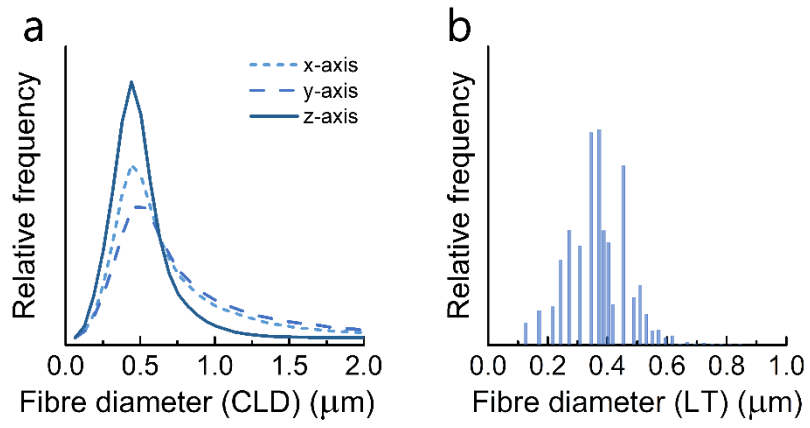

Fig S4. Fiber diameter analysis of densified sample using (a) Three-dimensional Chord Length Distribution (CLD) and (b) Local Thickness methods.

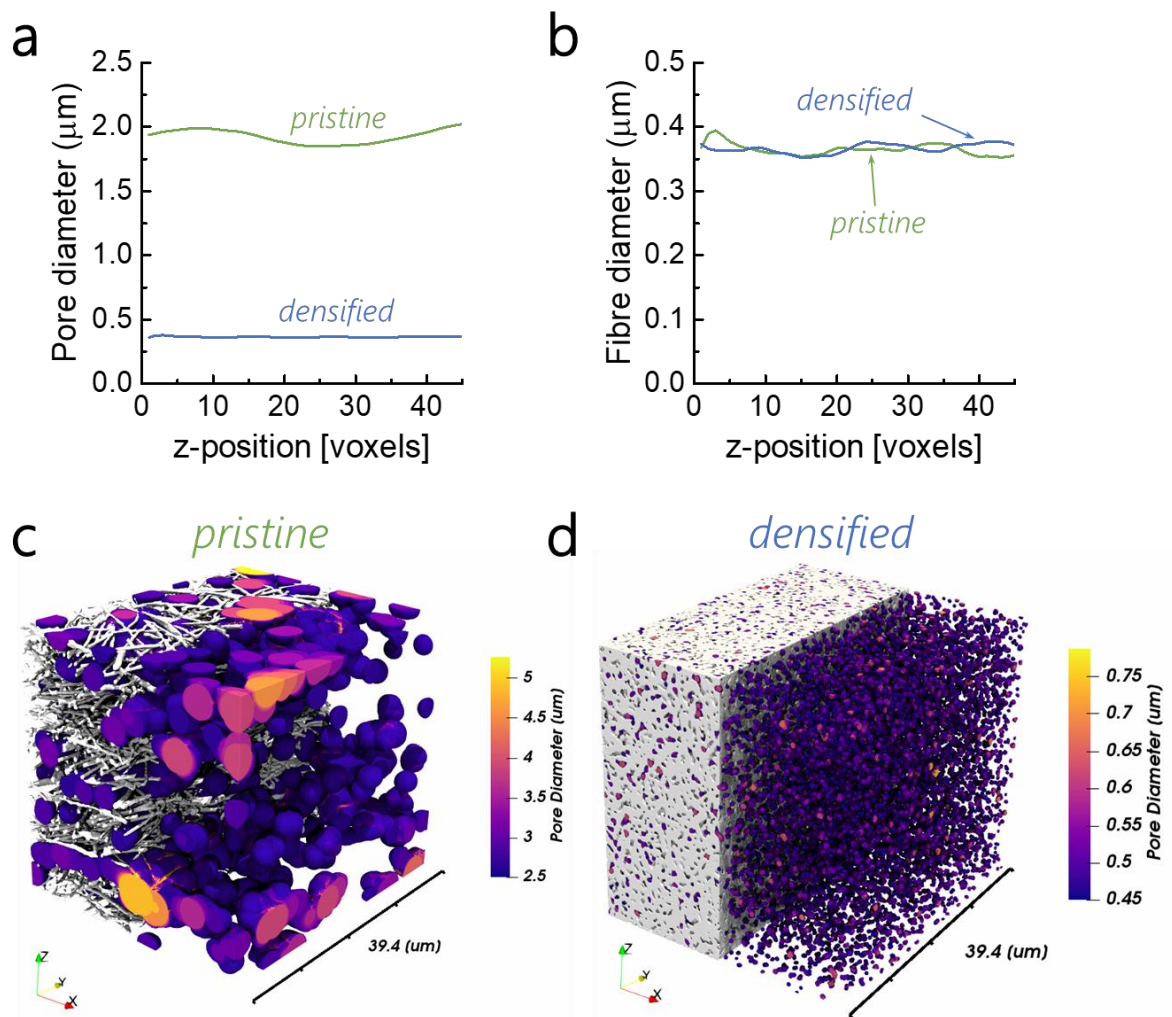

Fig S5. Thickness dependent (a) pore diameter and (b) fiber diameter, determined by local thickness (LT); Local thickness results overlaid on fiber volume renderings for (c) pristine and (d) densified on a large scale ( $\sim 40 \mu\text{m}$ ).



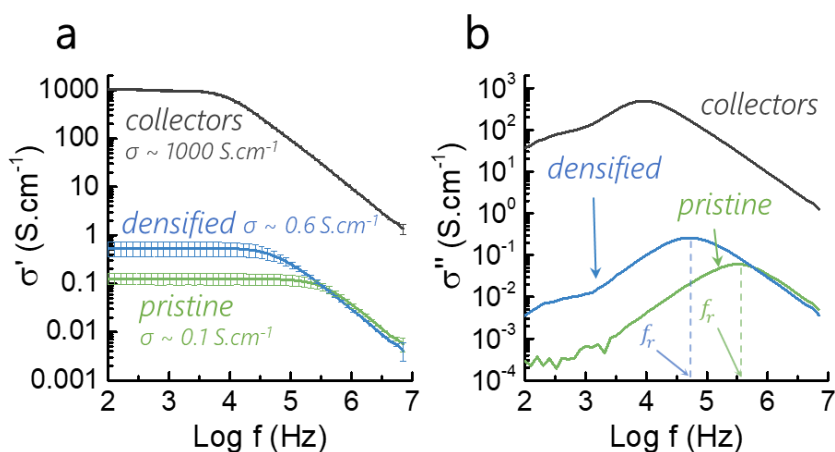

Fig S6. (a) Real component and (b) imaginary component of the electrical conductivity of pristine and densified compared to the current collectors measured by Electrochemical Impedance Spectroscopy (EIS). Calculations detailed in Equations (5) and (6). The relaxation time  $f_r$  represents the maximum lag between the oscillating electric field and the charge mobility. Shorter relaxation time are characteristics of more ideally conducting materials, which dissipate less heat when conducting charges.

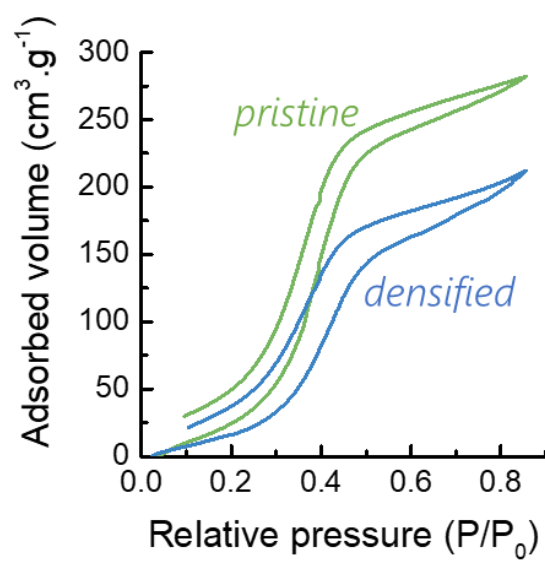

Fig S7. Water adsorption isotherms measured between  $10^{-3}$  and  $0.9 P/P_0$  showing the pronounced H<sub>2</sub>O adsorption in the micropores at  $P/P_0 \sim 0.4-0.5$ .<sup>[1]</sup>

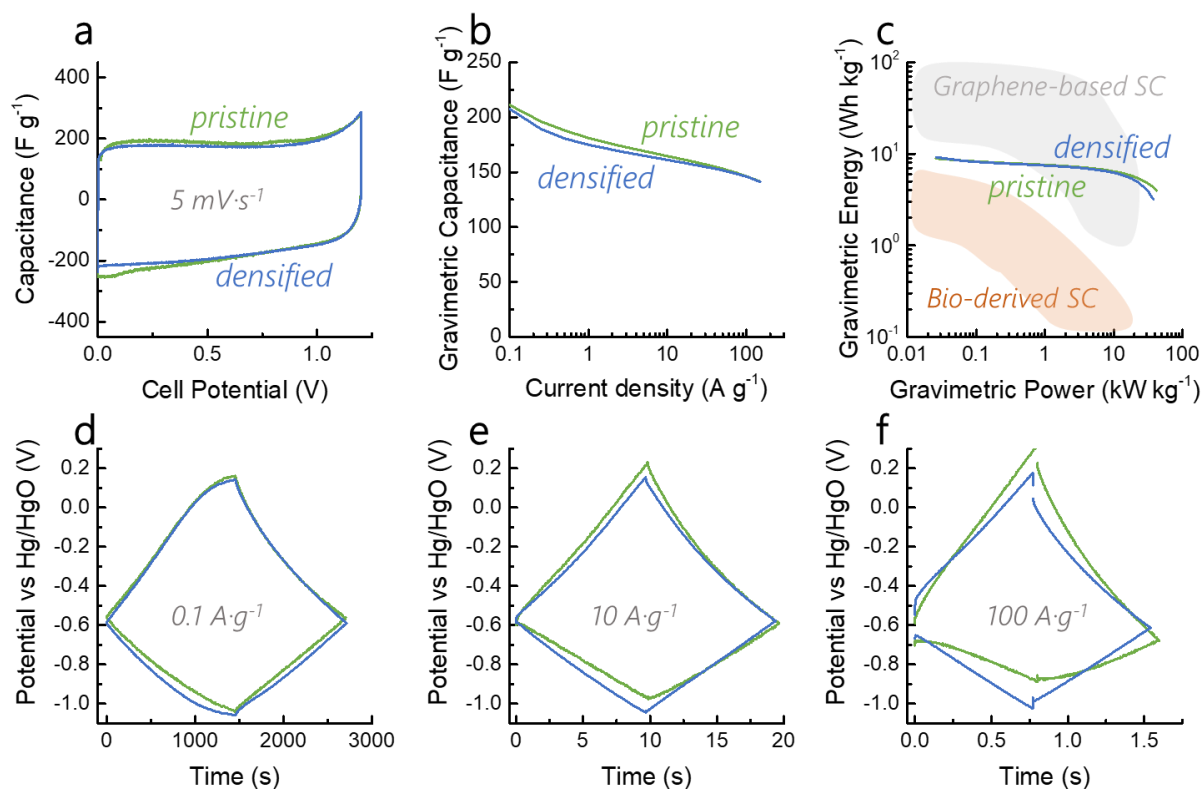

Fig S8. Electrochemical Characterization in aqueous 6M KOH for pristine and densified: (a)-Cyclo-voltammograms measured at  $5 \text{ mV}\cdot\text{s}^{-1}$ ; (b) Gravimetric rate capability; (c) Gravimetric Ragone plot showing the performances of pristine and densified compared with commercial activated carbon supercapacitors (SC)(see references<sup>[2,3]</sup>) and the newly developed (<3 years) graphene-based SC (see reference on Figure 4); Galvanostatic charge discharge of the full symmetric supercapacitor at (d)  $0.1 \text{ A}\cdot\text{g}^{-1}$ , (e)  $10 \text{ A}\cdot\text{g}^{-1}$  and (f)  $100 \text{ A}\cdot\text{g}^{-1}$  showing the working and counter electrode polarization becoming more asymmetric at higher rates.

Table S2. Pseudocapacitive contribution to the charge storage

|           | $C_T$<br>[F.g <sup>-1</sup> ] | $C_{DL}$<br>[F.g <sup>-1</sup> ] | $C_{PS}$<br>[F.g <sup>-1</sup> ] | Pseudocapacitive<br>contribution (%) |
|-----------|-------------------------------|----------------------------------|----------------------------------|--------------------------------------|
| pristine  | 47.6                          | 41.6                             | 6                                | 14.5                                 |
| densified | 46.8                          | 39.6                             | 7.24                             | 18.3                                 |

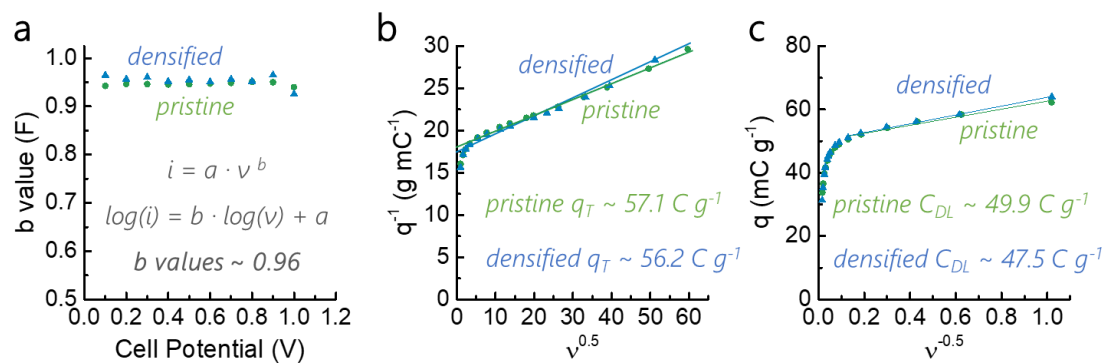

Fig S9. Electrochemical Characterization in aqueous 6M KOH for pristine and densified: (a)-Cyclo-voltammograms measured at  $5 \text{ mV s}^{-1}$ ; (b) Gravimetric rate capability; (c) Gravimetric Ragone plot showing the performances of pristine and densified compared with commercial activated

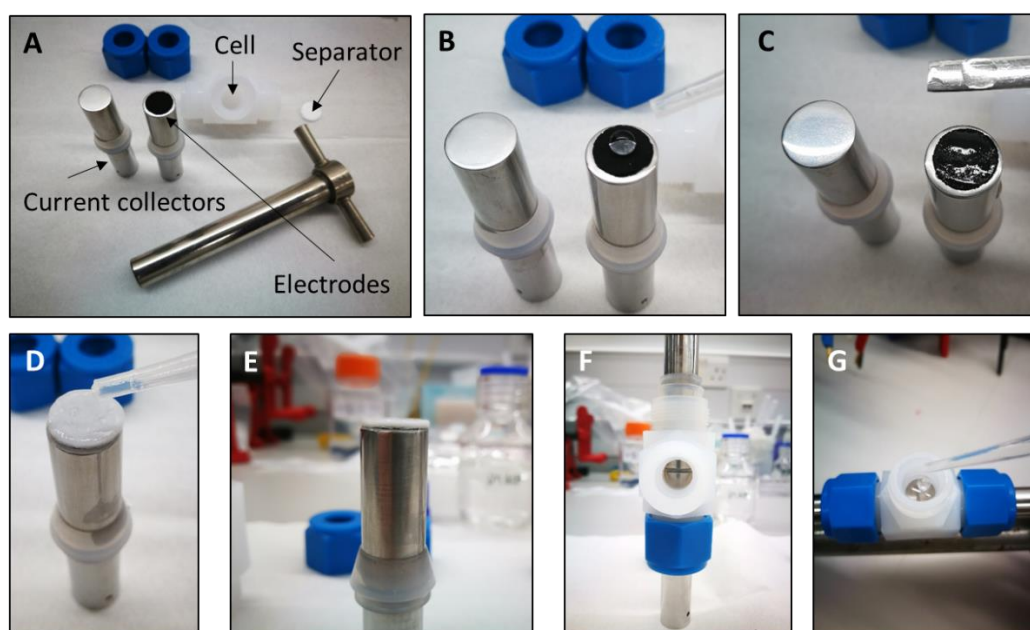

Fig S10. Photographs of the cell assembly showing the assembly steps. (a) Components of the cell; (b) Electrolyte dropping onto the carbon electrode; (c) wetting the electrode with the spatula to ensure maximum penetration of the electrolyte into the micrometer size pores; (d) Soaking of the glass fiber separator with the electrolyte; (e)-(g) mounting the cell by pressing the current collectors in a Swagelok-type cell.

## References

- [1] L. Liu, S. Johnathan, T. Horikawa, D. D. Do, D. Nicholson, J. Liu, 2017, 250, 64.
- [2] Y. Xu, Z. Lin, X. Zhong, X. Huang, N. O. Weiss, Y. Huang, X. Duan, Nat. Commun. 2014, 5.
- [3] H. Li, Y. Tao, X. Zheng, J. Luo, F. Kang, H.-M. Cheng, Q.-H. Yang, Energy Environ. Sci. 2016, 9, 3135.
